# Supplementary material for: 5-Azacytidine treatment sensitizes tumor cells to T-cell mediated cytotoxicity and modulates NK cells in patients with myeloid malignancies
Source: PubMed Central journal article supplement (PMC3972700; doi:10.1038/bcj.2014.14), 2014-03-28
Supplement: bcj201414x7.pdf [file bcj201414x7.pdf]

## Supplementary table 1: Cancer-testis antigens used for T-cell immunity screening in AZA treated patients

| Gene       | HLA allele | Peptide     | References                     |
|------------|------------|-------------|--------------------------------|
| CDCA1/NUF2 | A2         | KLATAQFKI   | Harao, 2008                    |
|            | A2         | YMMPVNSEV   | Harao, 2008                    |
| GnTV       | A2         | VLPDVFIRCV  | Guilloux, 1996                 |
|            | A2         | VLPDVFIRC   | Guilloux, 1996                 |
| HERV-K-MEL | A2         | MLAVISCAV   | Schiavetti, 2002               |
| LAGE-1     | A2         | MLMAQEALAFI | Aarnoudse, 1999                |
|            | A2         | SLLMWITQC   | Rimoldi, 2000                  |
|            | B7         | APRGVRMAV   | Slager, 2004                   |
| MAGE-A1    | A1         | EADPTGHSY   | Traversari, 1992               |
|            | A2         | KVLEYVIKV   | Ottaviani, 2005; Pascolo, 2001 |
|            | B7         | RVRFFFPSL   | Luiten, 2000                   |
|            | A3         | SLFRAVITK   | Chaux, 1999                    |
| MAGE-A10   | A2         | GLYDGMEHL   | Bricard, 2005; Huang, 1999     |
| MAGE-A2    | A2         | KMVELVHFL   | Visseren, 1997                 |
|            | A2         | YLQLVFGIEV  | Kawashima, 1998                |
|            | A2         | LVHFLLLKY   | Bredenbeck. 2005               |
|            | A2         | LVQENYLEY   | Bredenbeck. 2005               |
| MAGE-A3    | A1         | EVDPIGHLY   | Gaugler, 1994                  |
|            | A2         | FLWGPRALV   | van der Bruggen, 1994          |
|            | A2         | KVAELVHFL   | Kawashima, 1998                |
|            | A2         | LVFGIELMEV  | Keogh, 2001                    |
| MAGE-A4    | A1         | EVDPASNTY   | Kobayashi, 2003                |
|            | A2         | GVYDGREHTV  | Duffour, 1999                  |
| MAGE-A6    | A2         | YLEYRQVPV   | Graff-Dubois, 2002             |

| <b>Gene</b>    | <b>HLA allele</b> | <b>Peptide</b> | <b>References</b>           |
|----------------|-------------------|----------------|-----------------------------|
| MAGE-A9        | A2                | ALSVMGVYV      | Oehlrich, 2005              |
| MAGE-C2        | A2                | LLFGLALIEV     | Ma, 2004                    |
|                | A2                | ALKDVEERV      | Ma, 2004                    |
| NY-ESO-1 / LAG | A2                | MLMAQEALAFI    | Aarnoudse, 1999             |
|                | A2                | QLSLLMWIT      | Jager, 1998                 |
|                | A2                | SLLMWITQA      | Jager, 1998; Chen, 2000     |
|                | A2                | SLLMWITQC      | Jager, 1998; Chen, 2000     |
|                | A2                | SLLMWITQCFL    | Jager, 1998                 |
|                | B7                | APRGPHGGAAS    | Ebert, 2009                 |
| SART-3         | A2                | RLAEYQAYI      | Ito, 2000                   |
|                | A3                | WLEYYNLER      | Minami, 2007                |
|                | A3                | QIRPIFSNR      | Minami, 2007                |
|                | A2                | LLQAEAPRL      | Ito, 2000                   |
| Sp17           | A1                | ILDSSEEDK      | Chiriva-Internati, 2003     |
| SSX-2          | A2                | KASEKIFYV      | Ayyoub, 2002; Bricard, 2005 |
|                | A2                | RLQGISPKI      | Wagner, 2003                |
| TAG            | A3                | RLSNRLLLR      | Hogen, 2004                 |
| TAG-1          | A2                | SLGWLFLLI      | Adair, 2008                 |
| TRAG-3         | A2                | ILLRDAGLV      | Zhu, 2003                   |
| TRP2-6b        | A2                | ATTNILEHY      | Khong, 2002                 |
